# Supplementary material for: Vesicular Egress of Non-Enveloped Lytic Parvoviruses Depends on Gelsolin Functioning
Source: PLoS Pathog. 2008 Aug 15;4(8):e1000126. doi: 10.1371/journal.ppat.1000126 (PMC2494870; doi:10.1371/journal.ppat.1000126)
Supplement: Figure S1 — (0.06 MB PDF) [file ppat.1000126.s001.pdf]

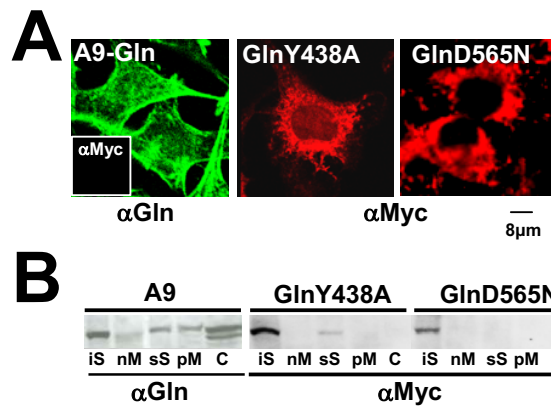

Supplement 1:

Asynchronously growing A9, or derivatives expressing dominant-negative gelsolin mutants (GlnY438A; GlnD565N) were infected with MVMp (30 pfu/cell) and analyzed 48 h p.i. (A) for the presence of recombinant gelsolin by immunofluorescence staining by means of their N-terminal myc-tag with  $\alpha$ Myc. Endogenous gelsolin of parental A9 cells was shown for comparison using  $\alpha$ Gln. (B) For association with cellular scaffold and membrane structures by fractionating cell extracts using a combined sedimentation and Triton X-100 extraction procedure. The distribution of the respective proteins in the various fractions was determined by Western blotting using  $\alpha$ Myc. Endogenous gelsolin of parental A9 cells was shown for comparison using  $\alpha$ Gln. iS, insoluble scaffold proteins; nM, mainly nuclear (membrane) constituents; sS, soluble scaffold proteins; pM, mainly vesicular and plasmic (membrane) constituents; C, cytosolic soluble proteins.
