# Supplementary material for: Vesicular Egress of Non-Enveloped Lytic Parvoviruses Depends on Gelsolin Functioning
Source: PubMed Central journal article supplement (PMC2494870; doi:10.1371/journal.ppat.1000126), 2008-08-15
Supplement: ppat.1000126.s003.pdf [file ppat.1000126.s003.pdf]

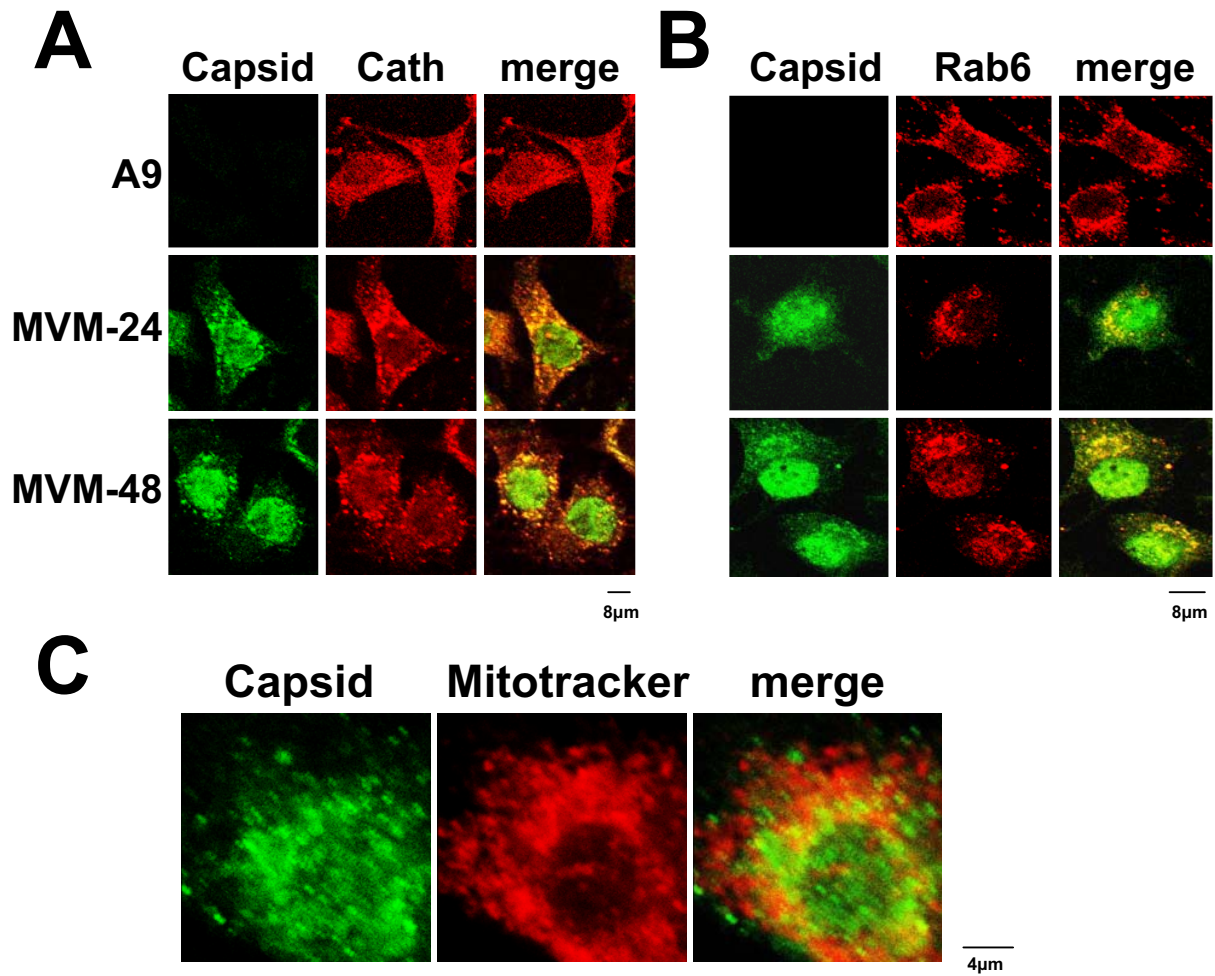

Supplement 3:

A9 cells and derivatives expressing GlnY438A or GlnD565N were grown on spot slides and infected with CsCl-gradient-purified MVM (30 pfu/cell) or mock-treated, and fixed with paraformaldehyde 24 and 48 h p.i. To avoid second-round infections, cells were treated with neuraminidase after infection. Capsids (detected with  $\alpha$ B7 [green]) were analyzed by confocal laser scanning microscopy for their subcellular localization relative to that of CathepsinB-positive (A) or Rab6-positive vesicles (B). Scale bar 8  $\mu$ m. C, negative control, showing no colocalization with mitochondrial staining with mito-tracker. Colocalization regions appear as yellow in the merge
